# Supplementary material for: Retracted Article: Synthesis of a novel type of chiral salen Mn(iii) complex immobilized on crystalline zinc poly(styrene-phenylvinylphosphonate)-phosphate (ZnPS-PVPP) as effective catalysts for asymmetric epoxidation of unfunctionalized olefins
Source: Royal Society of Chemistry journal article supplement (doi:10.1039/c1cy00285f), 2011-01-01
Supplement: c1cy00285f.pdf [file c1cy00285f.pdf]

## Supplementary Information

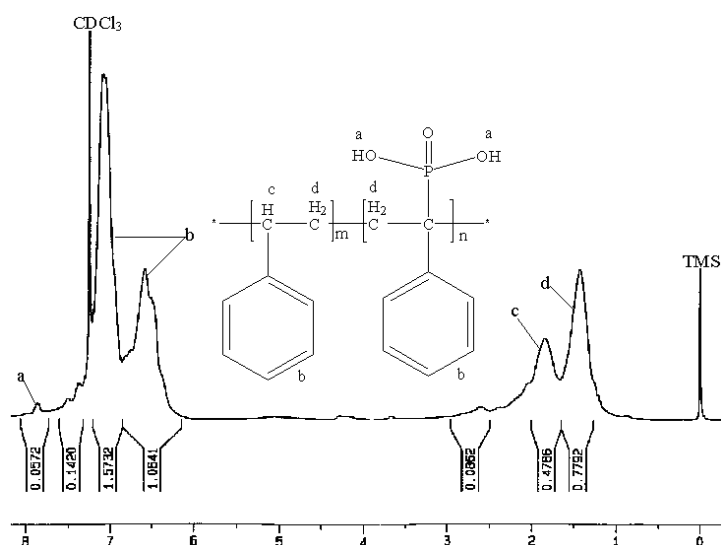

Fig. S1  $^1\text{H}$  NMR of copolymer

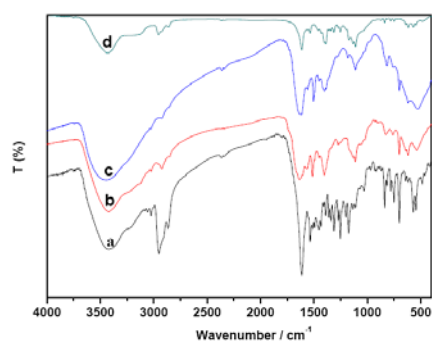

Fig. S2 FT-IR spectra of (a) 3a; (b) 3b; (c) 3c; (d) the neat chiral salen Mn(III) complex 2

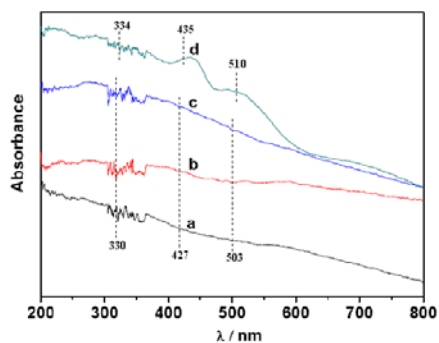

Fig. S3 UV-vis spectra of (a) 3a; (b) 3b; (c) 3c; (d) the neat chiral salen Mn(III) complex 2

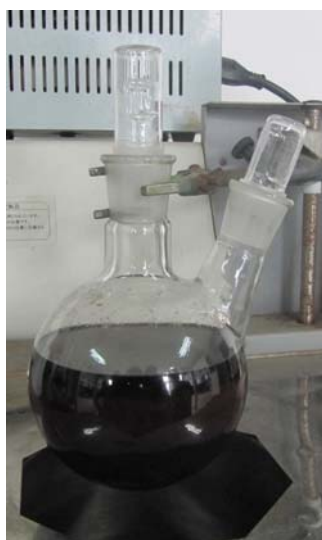

Fig. S4 Large-scale asymmetric epoxidation reaction of  $\alpha$ -methylstyrene (100 times as much as the experimental scale)

GC chromatograms of standard racemic epoxide sample (indene oxide)

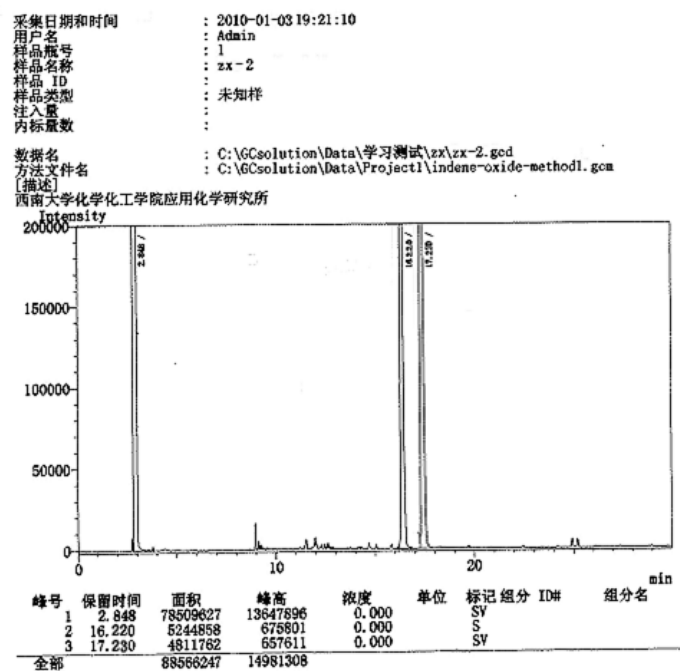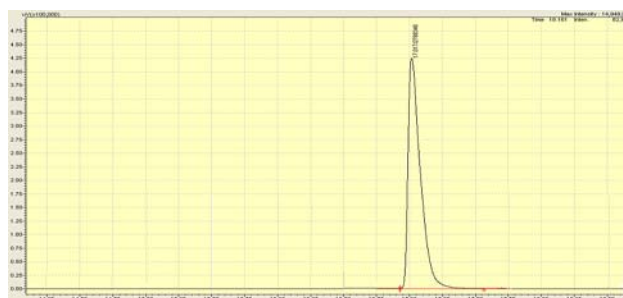

Entry 9 in Table 2.

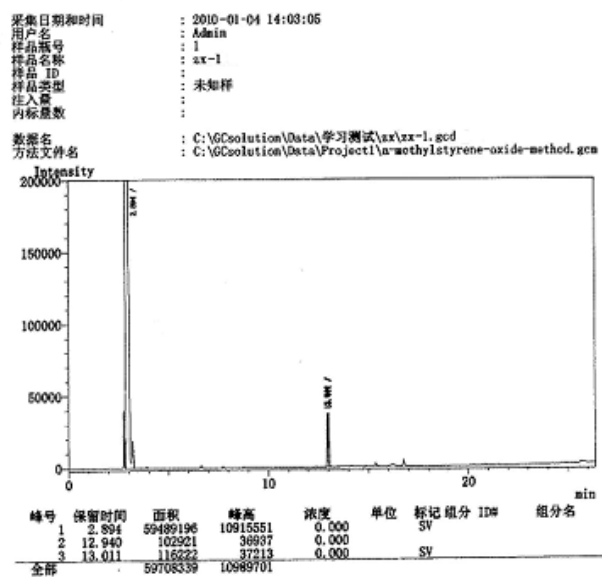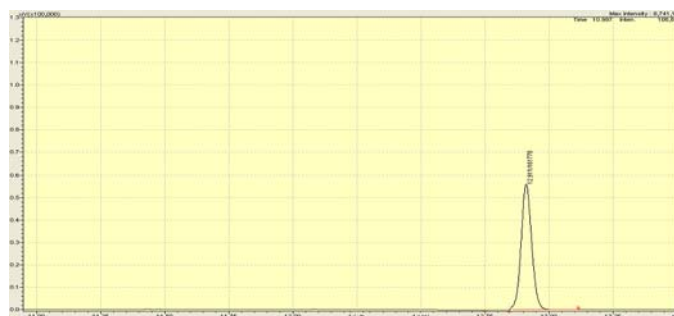

Entry 4 in Table 5.
